# Supplementary material for: Mechanically Robust Dual-Crosslinking Elastomer Enabled by a Facile Self-Crosslinking Approach
Source: MDPI journal article supplement (doi:10.3390/ma15113983), 2022-06-03
Supplement: s1 [file s1]

# **Mechanically robust dual-crosslinking elastomer enabled by a facile self-crosslinking approach**

Zhendong Huang<sup>a</sup>, Biqiang Jin<sup>a</sup>, Haitao Wu<sup>a</sup>, Zihang Zeng<sup>a</sup>, Minghui Huang<sup>a</sup>, Jinrong Wu<sup>a</sup>, Lusheng Liao<sup>b\*</sup>, and Jing Zheng<sup>a\*</sup>

<sup>a</sup> State Key Laboratory of Polymer Materials Engineering, College of Polymer Science and Engineering, Sichuan University, Chengdu 610065, China

<sup>b</sup> Guangdong Provincial Key Laboratory of Nature Rubber Processing, Agricultural Products Processing Research Institute of Chinese Academy of Tropical Agricultural Science, Zhanjiang 524001, China

## **Corresponding author contact:**

Associate Professor Jing Zheng

State Key Laboratory of Polymer Materials Engineering, College of Polymer Science and Engineering, Sichuan University, Chengdu 610065, China

Email: zhengjing@scu.edu.cn

Professor Lusheng Liao

Guangdong Provincial Key Laboratory of Nature Rubber Processing, Agricultural Products Processing Research Institute of Chinese Academy of Tropical Agricultural Science, Zhanjiang 524001, China

Email: 276491692@qq.com

Supplementary data

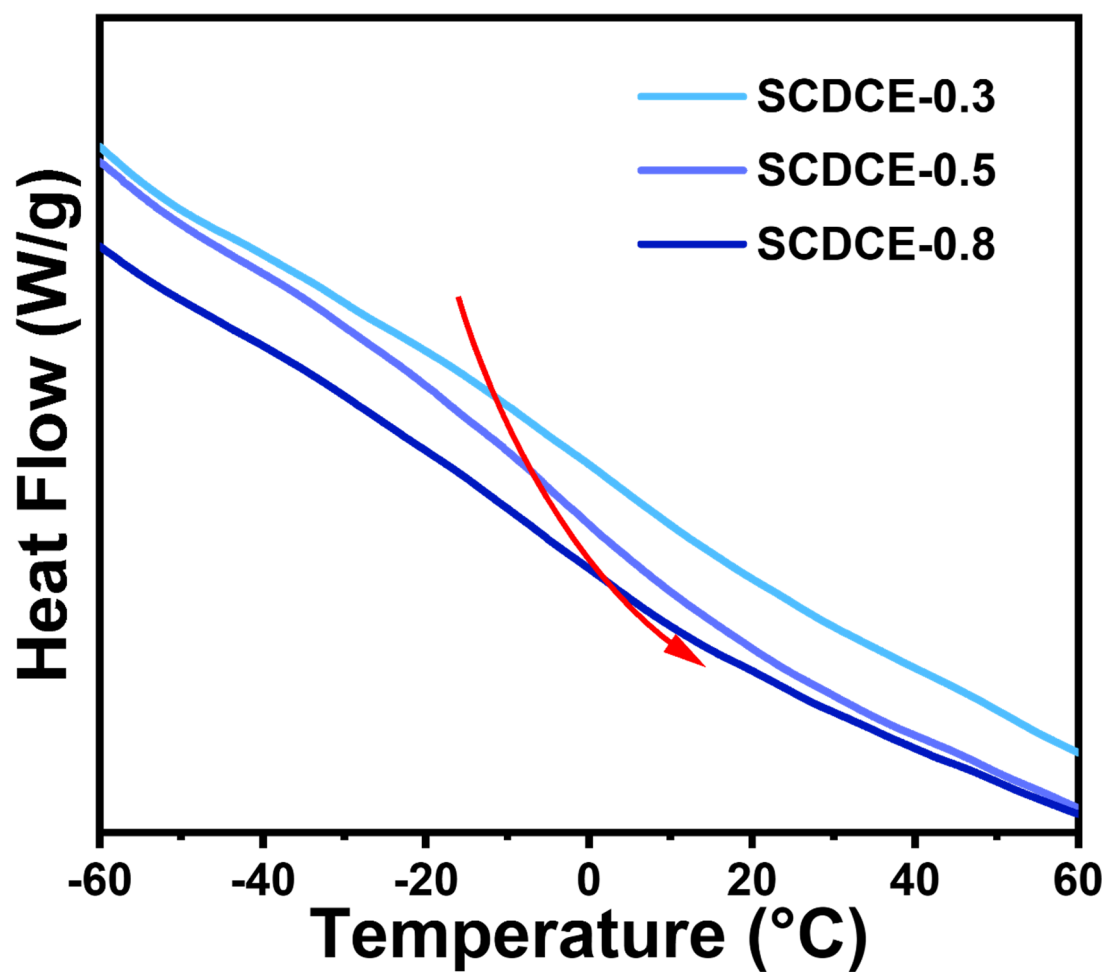

**Figure S1.** DSC curves of SCDCEs samples under N<sub>2</sub> in the temperature range of -70 °C to 60 °C at a heating scan rate of 5 °C min<sup>-1</sup>.

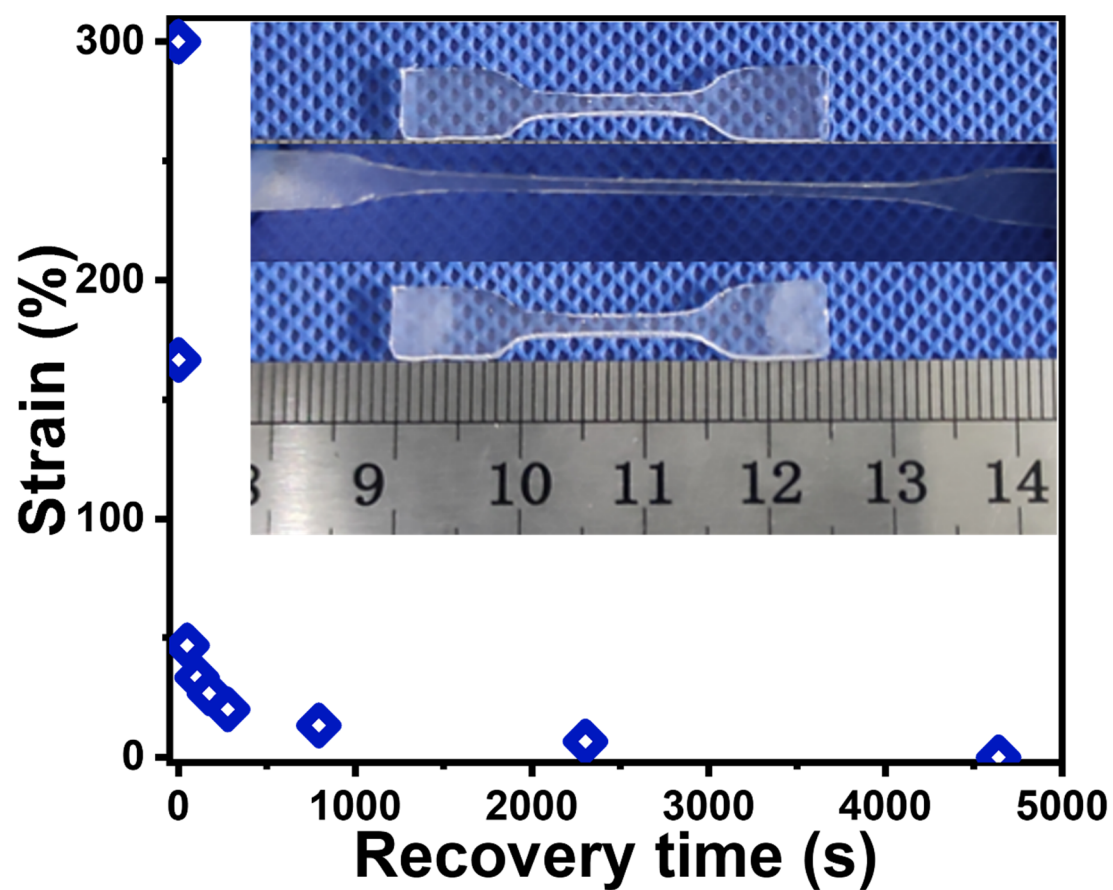

**Figure S2.** Recovery time of SCDNE-0.8 after stretched to the strain of 300%.
